# Supplementary material
Source: PubMed Central journal article supplement (PMC8603234)
Supplement: jamaoncol-e215445-s004.pdf [file jamaoncol-e215445-s004.pdf]

## Data Sharing Statement

Fokas. Chemoradiotherapy Plus Induction or Consolidation Chemotherapy as Total Neoadjuvant Therapy for Patients With Locally Advanced Rectal Cancer. *JAMA Oncol.* Published November 18, 2021. doi:10.1001/jamaoncol.2021.5445

### Data

**Data available:** No

### Additional Information

**Explanation for why data not available:** Local data privacy law does not allow sharing individual patient data
